# Supplementary material
Source: ML conference proceedings conference paper supplement (https://proceedings.mlr.press/v193/zhang22a.html)
Supplement: Supplementary file 1 [file zhang22a-supp.pdf]

Table 1: *Details of the experimental settings.* We do not perform heavy hyperparameter tuning to ensure the generalizability of our best practices. The ensemble is not used, which can further improve performances. \*For Brain, Vessel, and Pancreas, we train each model with 250,000 steps given their larger training set. We provide all the codes, including data pre-processing, data loading, model training, and evaluation at <https://github.com/yuhui-zh15/TransSeg>

| Hyperparam     | Value                                                                                                                                                                                                                                                                                                                            | Hyperparam        | Value   |
|----------------|----------------------------------------------------------------------------------------------------------------------------------------------------------------------------------------------------------------------------------------------------------------------------------------------------------------------------------|-------------------|---------|
| Batch Size     | 16                                                                                                                                                                                                                                                                                                                               | Patch Size        | 16×16×5 |
| Loss Function  | DiceFocal                                                                                                                                                                                                                                                                                                                        | Optimizer         | AdamW   |
| Learning Rate  | 3e-5                                                                                                                                                                                                                                                                                                                             | Weight Decay      | 5e-2    |
| Scheduler      | Slanted Triangular                                                                                                                                                                                                                                                                                                               | Warm-up Steps     | 20      |
| Step           | 25,000*                                                                                                                                                                                                                                                                                                                          | Hyperparam Tuning | No      |
| GPUs           | 8 Titan RTX                                                                                                                                                                                                                                                                                                                      | Time              | 8 Hours |
| Ensemble       | No multi-model, multi-view, multi-scale ensemble                                                                                                                                                                                                                                                                                 |                   |         |
| Train Data     | Random Zoom ( $[0.5\times, 2\times]$ ), Random Crop (if Zoom $> 1\times$ ),<br>Normalize Intensity ( $[-175, 250]$ (CT) or $[0, \text{MAX}]$ (MRI) $\rightarrow [-1, 1]$ ),<br>Random Flip ( $p = 0.1$ ), Random Rotation ( $p = 0.1$ ),<br>Random Shift Intensity ( $[-0.1, +0.1]$ with $p = 0.5$ ), Pad (if Zoom $< 1\times$ ) |                   |         |
| Inference Data | Normalize Intensity (same as training)                                                                                                                                                                                                                                                                                           |                   |         |
